# Supplementary material
Source: PubMed Central journal article supplement (PMC3438942)

Fig. S1

**a**

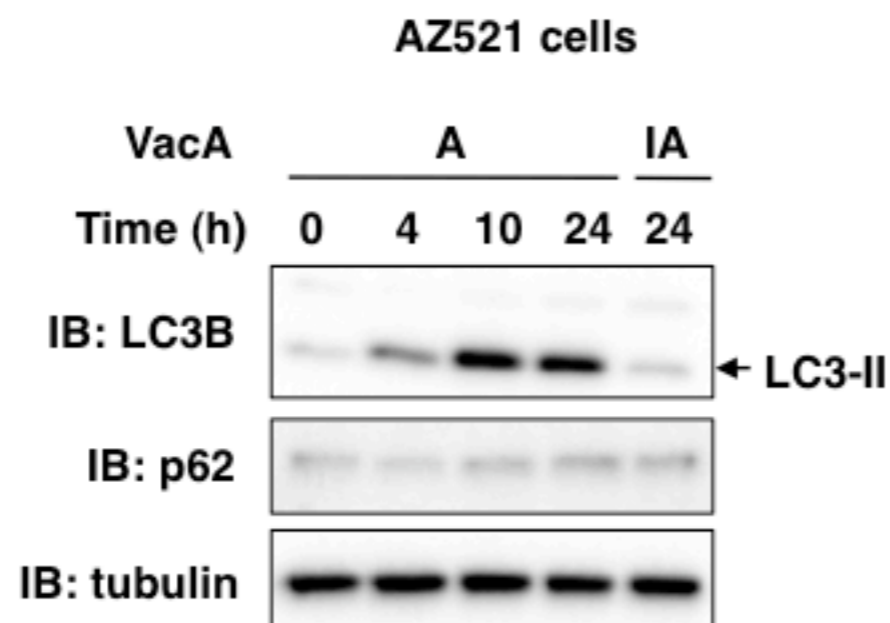

**b**

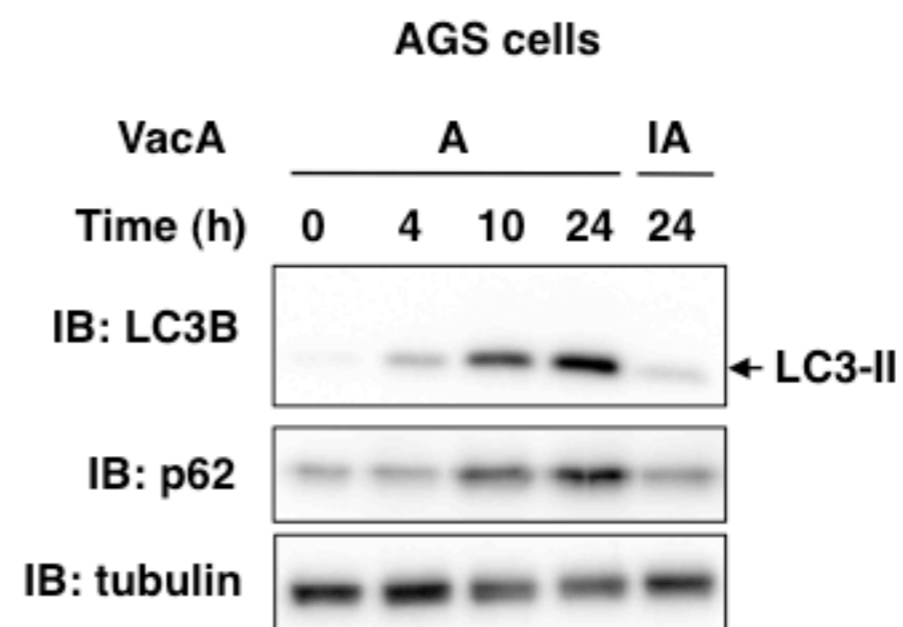

**c**

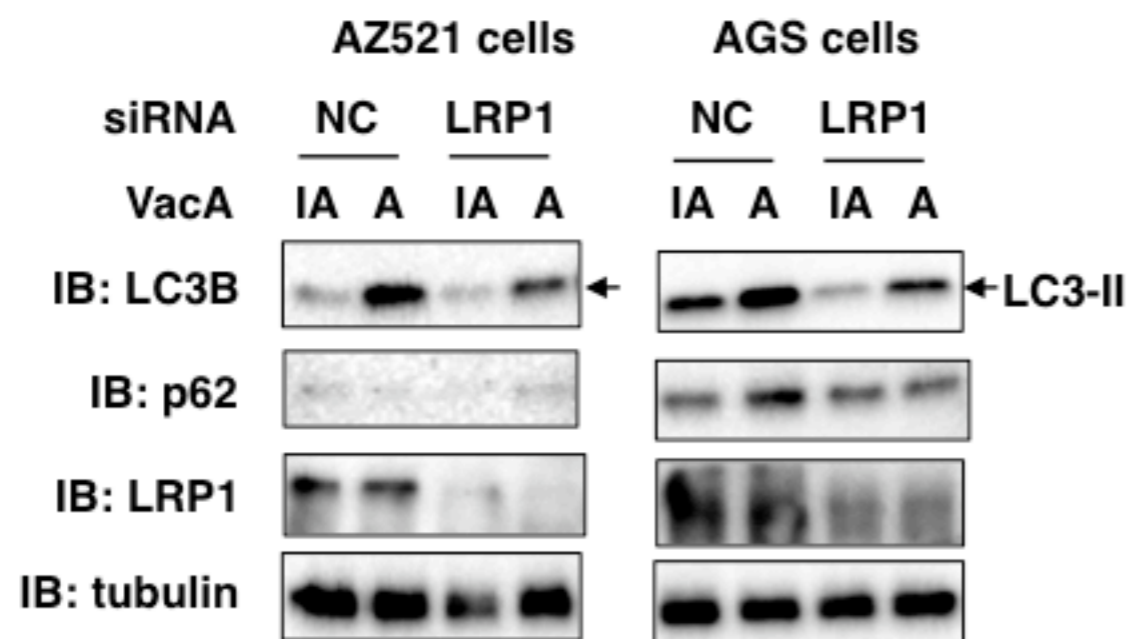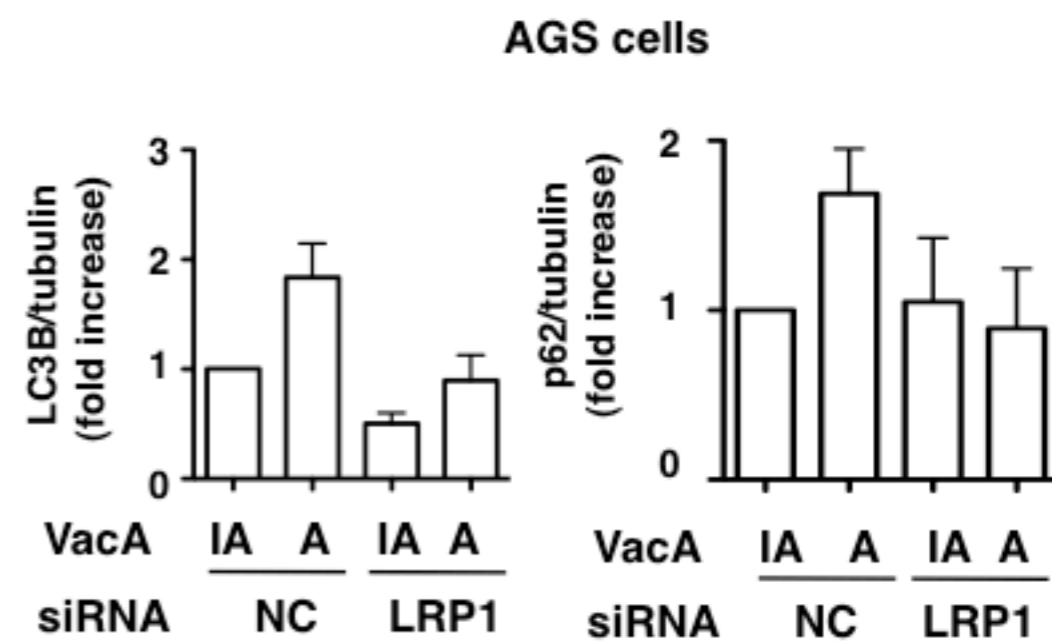

Supplement: supp_M112.387498_jbc.M112.387498-1.pdf [file supp_M112.387498_jbc.M112.387498-1.pdf]

Fig. S2

a

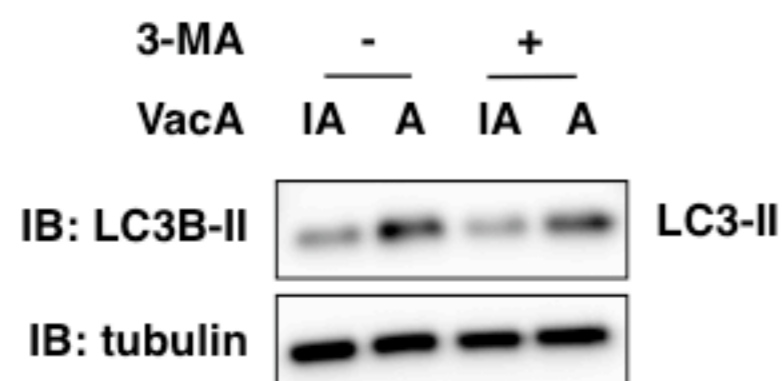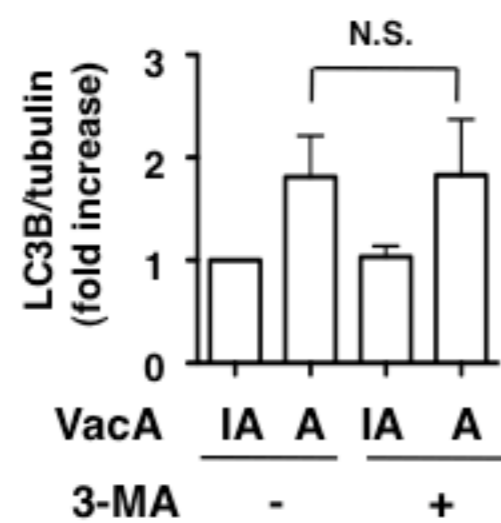

b

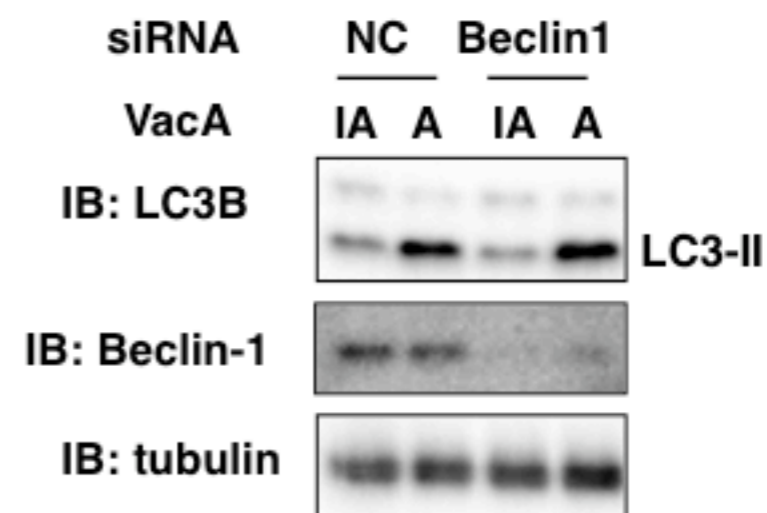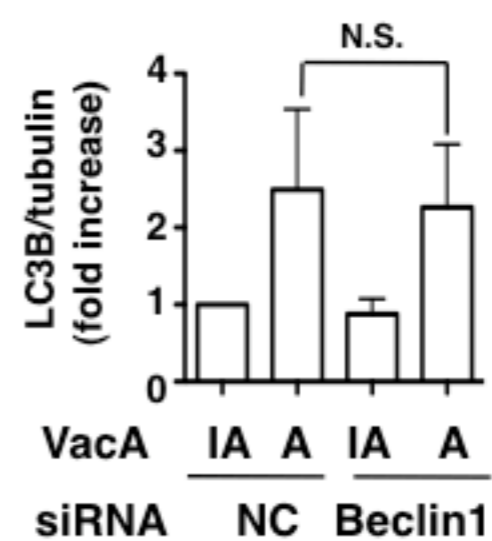

Supplement: supp_M112.387498_jbc.M112.387498-2.pdf [file supp_M112.387498_jbc.M112.387498-2.pdf]
